# Supplementary material
Source: PubMed Central journal article supplement (PMC8770612)
Supplement: NIHMS1758285-supplement-1.pdf [file NIHMS1758285-supplement-1.pdf]

## Supplemental Information

### Supplemental Figure 1.

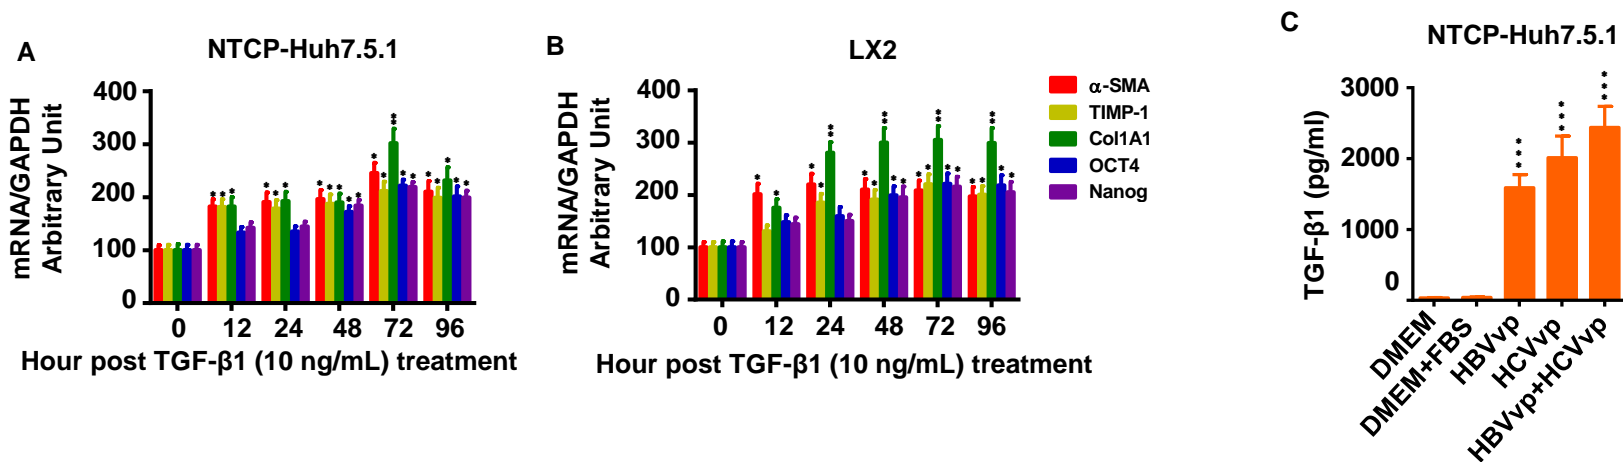

#### Supplemental Figure 1. TGF-β1 increases OCT4/Nanog and fibrosis-related gene expression in NTCP-Huh7.5.1 and LX2 cells.

NTCP-Huh7.5.1 or LX2 cells (30,000 cell /well in 1 mL) were seeded into 24-well plates and incubated with 10 ng/mL TGF-β1 for 0-96 hours. mRNA expression of fibrosis-related genes in NTCP-Huh7.5.1 and LX2 cells were detected by qPCR and normalized to GAPDH. NTCP-Huh7.5.1 were also infected HBV/HCVvp and TGF-β1 level from supernatant was detected by ELISA Kits.

(A) TGF-β1 treatment enhanced α-SMA, TIMP-1, Col1A1, OCT4 and Nanog mRNA expression in NTCP-Huh7.5.1 cells.

(B) TGF-β1 treatment enhanced α-SMA, TIMP-1, Col1A1, OCT4 and Nanog mRNA expression in LX2 cells.

(C) HBVvp, HCVvp or HBVvp/HCVvp infection in NTCP-Huh7.5.1 cells significantly increased TGF-β1 levels in supernatant.

Data are representative of 3 independent experiments with similar results. Bars represent means  $\pm$  SD of 3 biological repeats. \*,  $p < 0.05$ . \*\*,  $p < 0.01$ . \*\*\*,  $p < 0.001$ .

## Supplemental Figure 2.

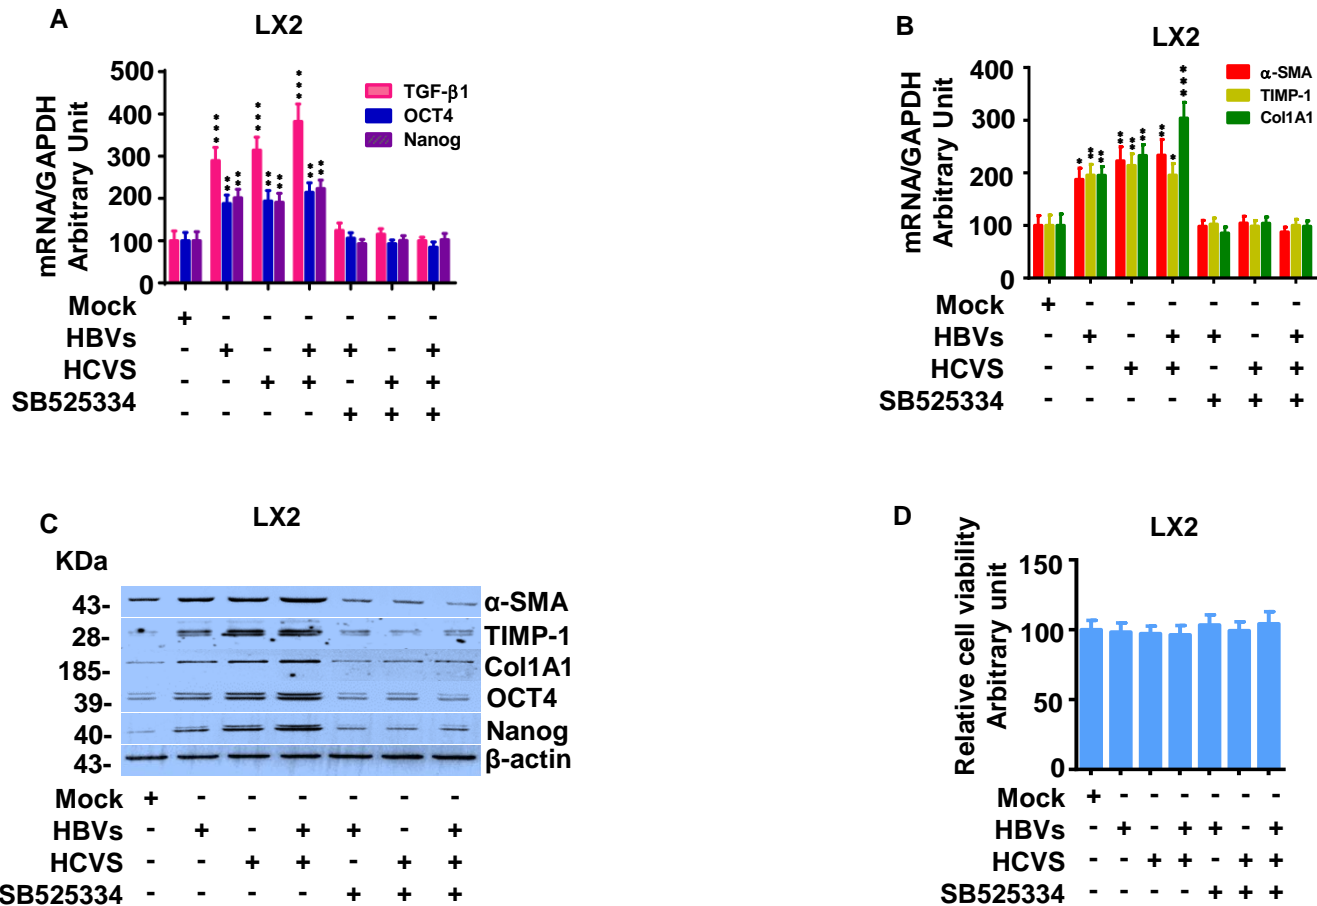

**Supplemental Figure 2. TGF-β1 inhibitor (SB525334) blocks HBVs-/HCVs-induced activation of OCT4/Nanog and fibrosis-related genes in LX2 cells.** LX2 cells (30,000 cell/well in 1 mL) were seeded into 24 well-plates. 100 μL of HBVs, HCVs, TGF-β1 inhibitor (SB525334, 1 μM final) or uninfected supernatant was added to the appropriate well for 72 hours. Cell lysates were harvested for mRNA and protein analyses or cell viability assays.

(A). TGF-β1 inhibitor (SB525334) blocked HBVs-, HCVs- and (HBV/HCV)s induced activation of TGF-β1, OCT4 and Nanog mRNA expression in LX2 cells.

(B). TGF-β1 inhibitor (SB525334) blocked HBVs-, HCVs- and (HBV/HCV)s induced activation of α-SMA, TIMP-1, and Col1A1 mRNA expression in LX2 cells.

(C). TGF-β1 inhibitor (SB525334) blocked HBVs-, HCVs- and (HBV/HCV)s induced activation of α-SMA, TIMP-1, Col1A1, OCT4 and Nanog in LX2 cells.

(D) TGF-β1 inhibitor (SB525334) did not significantly affect LX2 cell viability.

Data are representative of 3 independent experiments with similar results. Bars represent means ± SD of 3 biological repeats. \*,  $p < 0.05$ . \*\*,  $p < 0.01$ . \*\*\*,  $p < 0.001$ .

### Supplemental Figure 3.

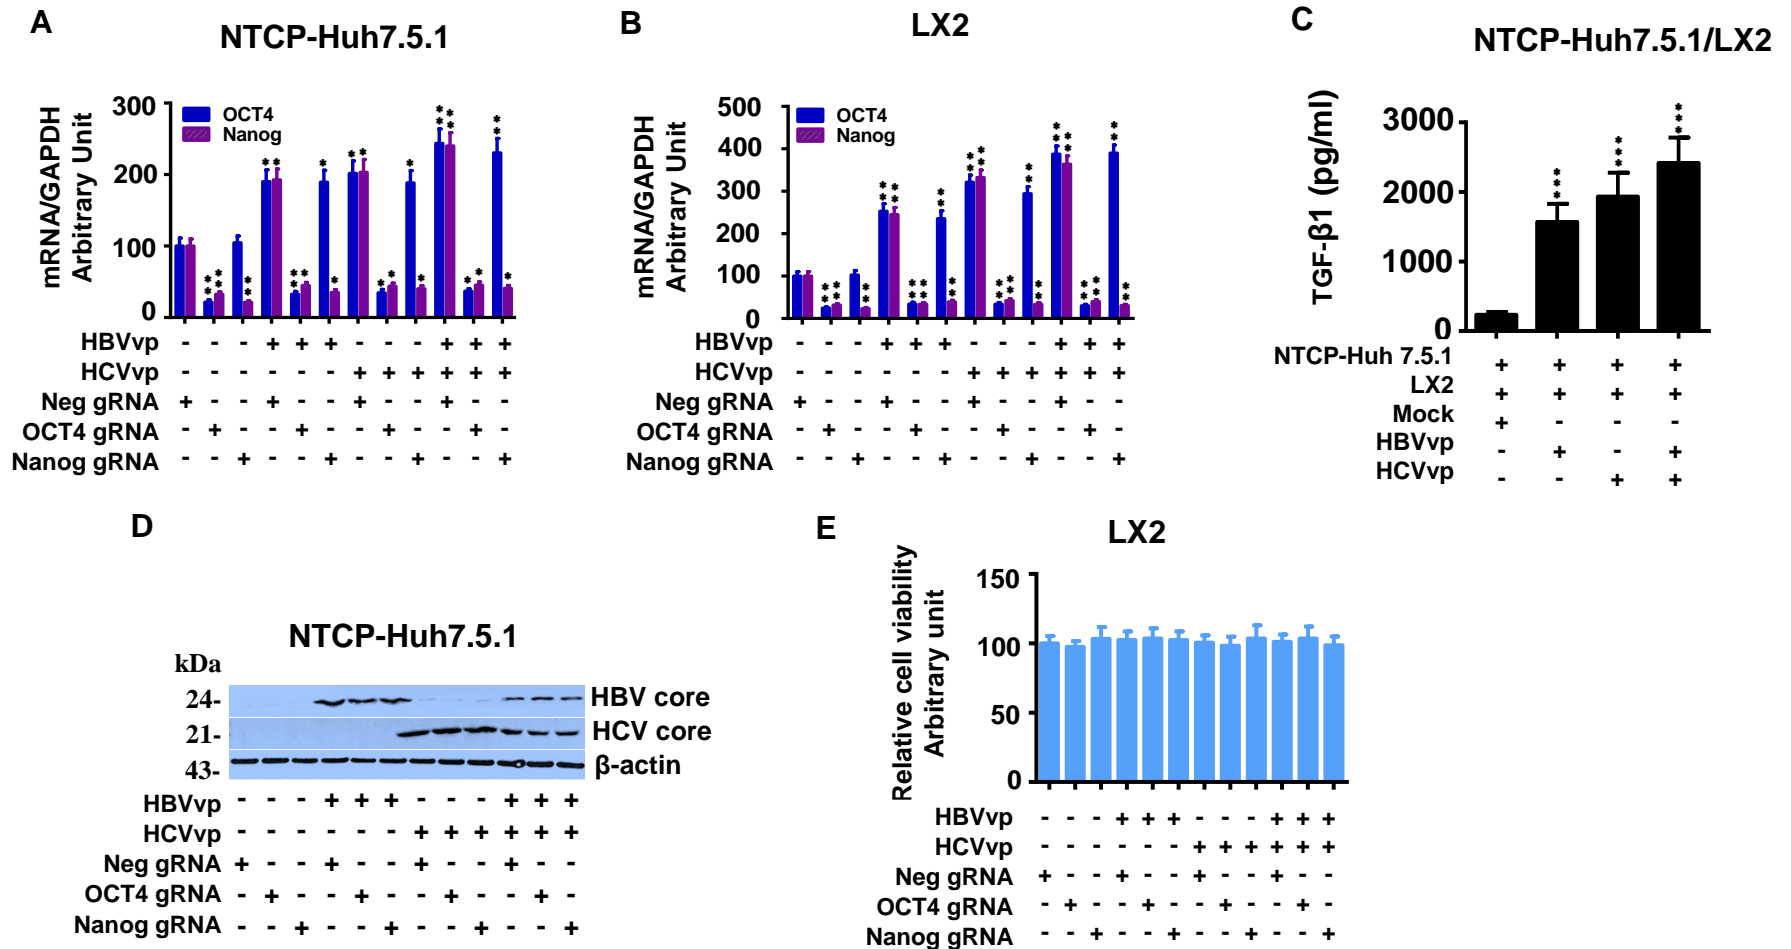

**Supplemental Figure 3. OCT4 and Nanog gRNA reduce HBV/JFH1-HCV-induced OCT4/Nanog upregulation in NTCP-Huh7.5.1 and LX2 cells in a coculture system** Methods were described in Fig 7.

(A). OCT4/Nanog gRNA inhibited HBV- or HCV-induced OCT4/Nanog upregulation in NTCP-Huh7.5.1 cells.

(B). OCT4/Nanog gRNA inhibited HBV- or HCV-induced OCT4/Nanog upregulation in LX2 cells.

(C). HBVvp/HCVvp infection upregulated TGF-β1 levels in the supernatant of NTCP-Huh7.5.1/LX2 coculture system. TGF-β1 levels were detected by ELISA kits.

(D). Western blot for HBV core or HCV core confirmed the replication of HBV or HCV in NTCP-Huh7.5.1 cells in the NTCP-Huh7.5.1/LX2 coculture model.

(E). OCT4 gRNA and Nanog gRNA or HBVvp/HCVvp exposure did not significantly affect cell viability in LX2 cells. Cell viability was determined using the Cell Titer-Glo luminescent cell viability assay kit (Promega, Madison, WI) according to the manufacturer's instructions.

Data are representative of 3 independent experiments with similar results. Bars represent means ± SD of 3 biological repeats. \*,  $p < 0.05$ . \*\*,  $p < 0.01$ .

\*\*\*,  $p < 0.001$ .

## Supplemental Figure 4.

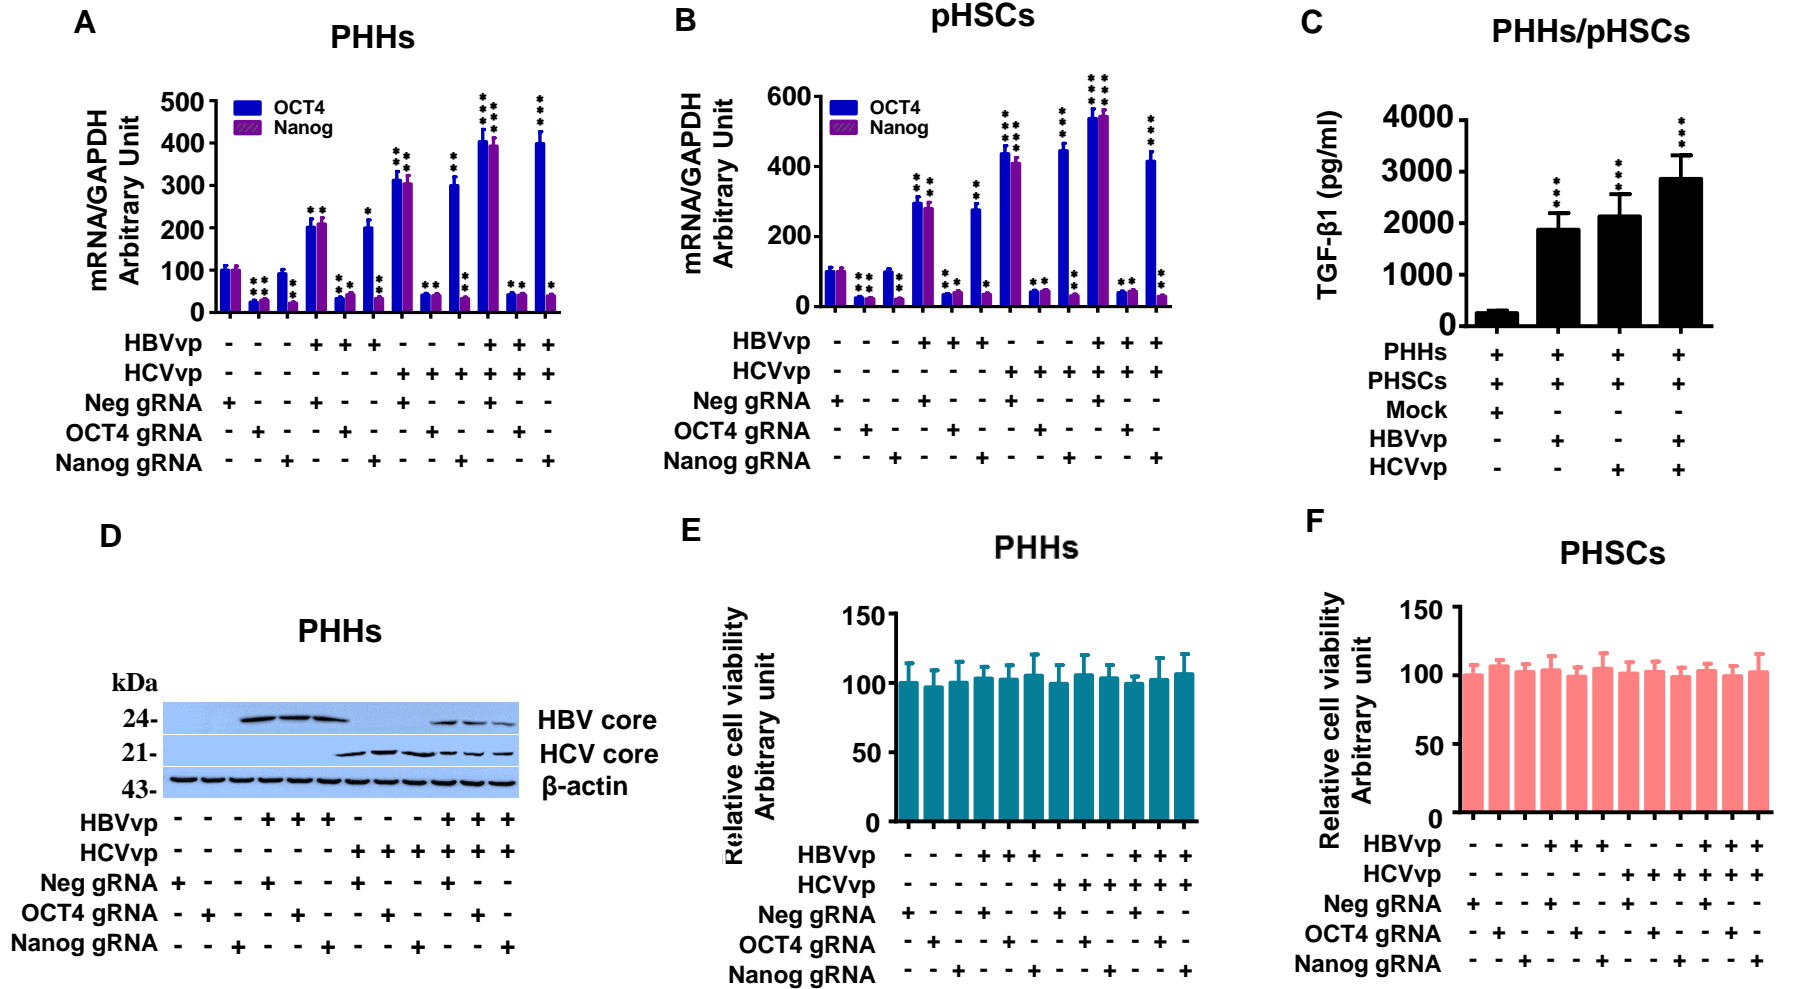

**Supplemental Figure 4. OCT4 and Nanog gRNA inhibit activation of OCT4/Nanog in the PHHs/pHSCs coculture HBV/HCV coinfection model. Methods were described in Fig 7**

(A). OCT4/Nanog gRNA inhibited HBV or HCV infection in NTCP-Huh7.5.1 induced mRNA enhancement of OCT4/Nanog in PHHs in the coculture.

(B). OCT4/Nanog gRNA inhibited HBV or HCV infection in PHHs induced mRNA enhancement of OCT4/Nanog in pHSCs in the coculture.

(C). HBV or HCV infection in PHHs cells increased soluble TGF- $\beta$ 1 levels in PHHs /pHSCs coculture.

(D). Western blot for HBV core or HCV core confirmed the replication of HBV or HCV in PHHs in coculture model.

(E). OCT4 gRNA and Nanog gRNA did not significantly affect cell viability of PHHs in PHHs /pHSCs coculture.

(F). OCT4 gRNA and Nanog gRNA did not significantly affect cell viability of PHSCs in PHHs/PHSCs coculture.

Data are representative of 3 independent experiments with similar results. Bars represent means  $\pm$  SD of 3 biological repeats. \*,  $p < 0.05$ . \*\*,  $p < 0.01$ . \*\*\*,  $p < 0.001$ .
